# Supplementary material for: Glycemic index and insulin index after a standard carbohydrate meal consumed with live kombucha: A randomised, placebo-controlled, crossover trial
Source: PubMed Central journal article supplement (PMC9982099; doi:10.3389/fnut.2023.1036717), 2023-02-17
Supplement: Image_1.pdf [file Image_1.pdf]

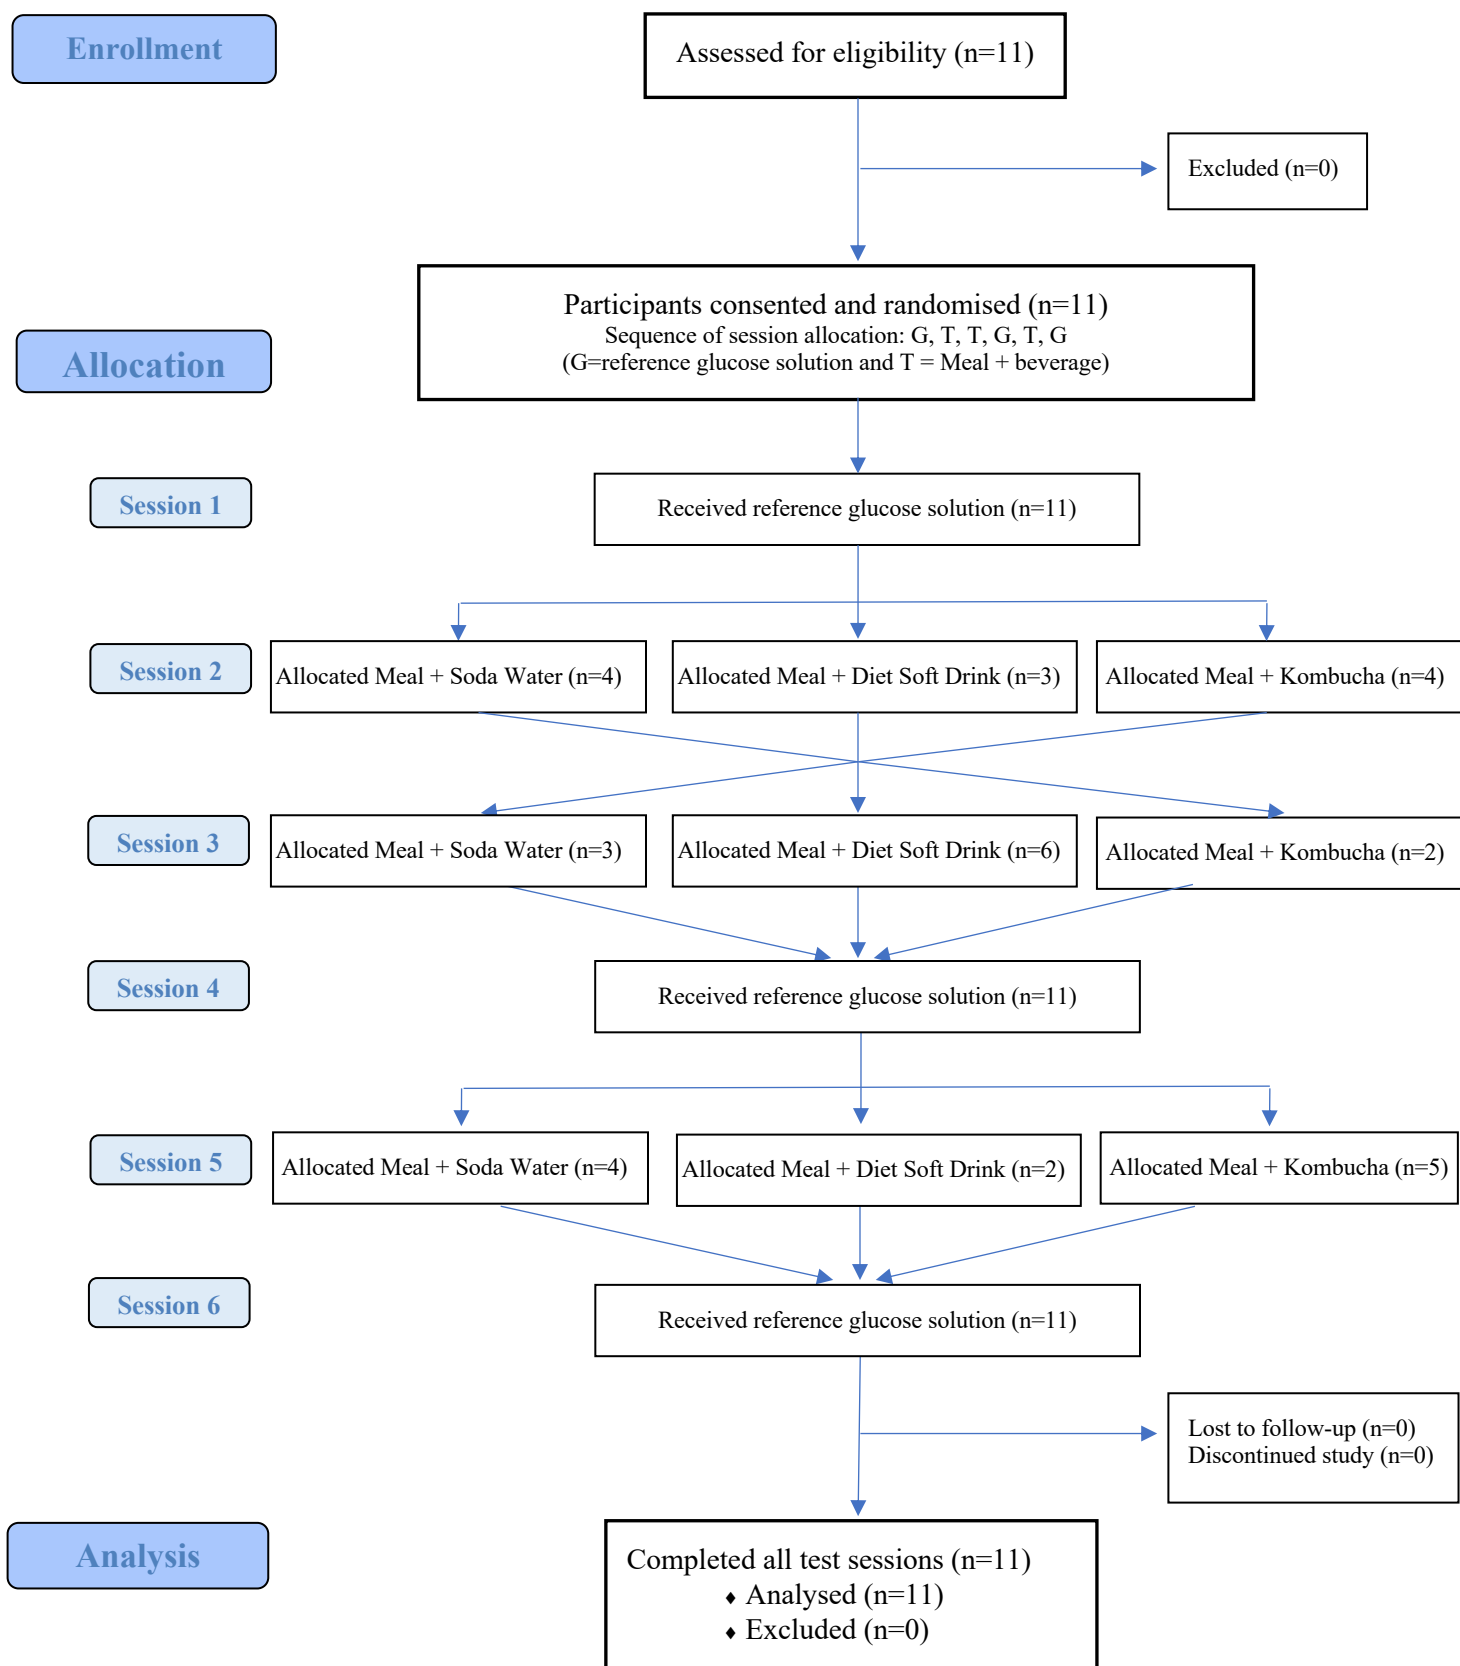

**Supplementary Figure 1.** Participant progression through the randomised, single-blinded crossover study. The reference glucose beverage was consumed by each participant on three separate occasions (sessions 1, 4, and 6) and a computer-generated research randomiser program determined the randomised consumption order for each of the three meal with beverage treatments.
