# Supplementary material for: Glycemic index and insulin index after a standard carbohydrate meal consumed with live kombucha: A randomised, placebo-controlled, crossover trial
Source: PubMed Central journal article supplement (PMC9982099; doi:10.3389/fnut.2023.1036717), 2023-02-17
Supplement: Table_1.pdf [file Table_1.pdf]

**Supplementary Table 1. Mean fasting plasma glucose and insulin concentrations of the reference glucose solution and the three test meals.** Data are shown as mean  $\pm$  standard error of the mean (SEM), n = 33 for the three repeated glucose solution tests and n = 11 for the three test meals.

| <b>Treatment</b>           | <b>Fasting glucose (mmol/L)</b> | <b>Fasting insulin (pmol/L)</b> |
|----------------------------|---------------------------------|---------------------------------|
| Reference glucose solution | 4.95 $\pm$ 0.07                 | 32.35 $\pm$ 1.55                |
| Rice meal + Soda Water     | 5.05 $\pm$ 0.08                 | 32.99 $\pm$ 1.57                |
| Rice meal + Diet Lemonade  | 5.02 $\pm$ 0.08                 | 32.58 $\pm$ 2.23                |
| Rice meal + Kombucha       | 5.02 $\pm$ 0.08                 | 33.03 $\pm$ 1.86                |
